# Supplementary material
Source: PubMed Central journal article supplement (PMC6802269)
Supplement: jamapediatr-173-1146-s002.pdf [file jamapediatr-173-1146-s002.pdf]

## Data Sharing Statement

Gray. Efficacy and Safety of Varenicline for Adolescent Smoking Cessation. *JAMA Pediatr*. Published October 14, 2019.  
10.1001/jamapediatrics.2019.3553

### Data

**Data available:** No

### Additional Information

**Explanation for why data not available:** We are happy to share/provide de-identified data upon request.
